# Supplementary material for: A star-shaped carbazole-based hole-transporting material with triphenylamine side arms for perovskite solar cells
Source: Royal Society of Chemistry journal article supplement (doi:10.1039/c8tc04191a), 2018-01-01
Supplement: c8tc04191a1.pdf [file c8tc04191a1.pdf]

## Supporting information

### A star-shaped carbazole-based hole-transporting material with triphenylamine side arms for perovskite solar cells

Xuepeng Liu,<sup>a</sup> Xihong Ding,<sup>a</sup> Yingke Ren,<sup>a</sup> Yi Yang,<sup>a</sup> Yong Ding,<sup>a</sup> Xiaolong Liu,<sup>a</sup> Ahmed Alsaedi,<sup>b</sup> Tasawar Hayat,<sup>b,c</sup> Jianxi Yao,<sup>a</sup> Songyuan Dai<sup>a\*</sup>

<sup>a</sup> Beijing Key Laboratory of Novel Thin-Film Solar Cells, North China Electric Power University, Beijing, 102206, P. R. China. \*E-mail: sydai@ncepu.edu.cn

<sup>b</sup> NAAM Research Group, Department of Mathematics, Faculty of Science, King Abdulaziz University, Jeddah, 21589, Saudi Arabia

<sup>c</sup> Department of Mathematics, Quaid-I-Azam University, Islamabad 44000, Pakistan

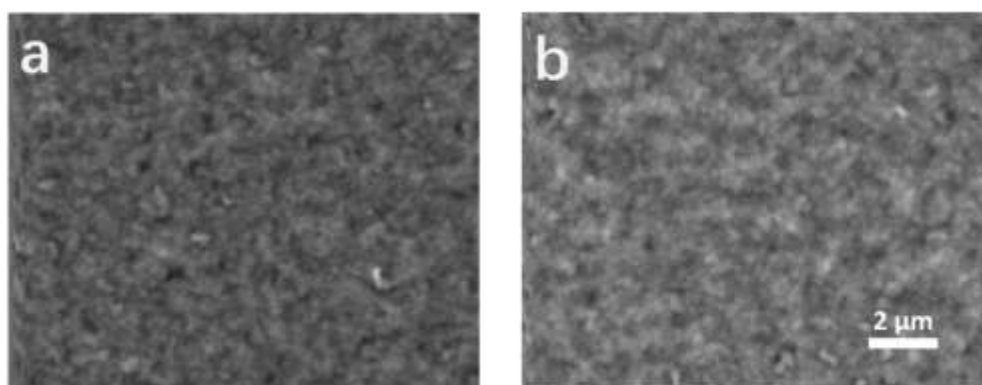

**Fig. S1** SEM images (top view) of the perovskite layers covered by **LD29** and spiro-OMeTAD.

**Table S1** Detailed device parameters of perovskite solar cells with different HTMs.

| HTM                | Concentration<br>(mg mL <sup>-1</sup> ) | V <sub>oc</sub><br>(V) | J <sub>sc</sub><br>(mA cm <sup>-2</sup> ) | FF<br>(%) | PCE<br>(%) |
|--------------------|-----------------------------------------|------------------------|-------------------------------------------|-----------|------------|
| pristine LD29      | 60                                      | 0.99                   | 18.43                                     | 70        | 12.78      |
| pristine LD29      | 60                                      | 1.03                   | 18.62                                     | 68        | 13.06      |
| pristine LD29      | 60                                      | 1.02                   | 19.01                                     | 68        | 13.20      |
| pristine LD29      | 60                                      | 1.02                   | 18.57                                     | 66        | 12.49      |
| pristine LD29      | 40                                      | 1.01                   | 19.44                                     | 69        | 13.56      |
| pristine LD29      | 40                                      | 0.98                   | 18.63                                     | 63        | 11.49      |
| pristine LD29      | 40                                      | 0.99                   | 19.29                                     | 65        | 12.43      |
| pristine LD29      | 40                                      | 1.01                   | 19.38                                     | 68        | 13.32      |
| pristine LD29      | 20                                      | 1.02                   | 19.60                                     | 71        | 14.29      |
| pristine LD29      | 20                                      | 1.03                   | 19.23                                     | 68        | 13.51      |
| pristine LD29      | 20                                      | 1.03                   | 18.60                                     | 70        | 13.39      |
| pristine LD29      | 20                                      | 0.99                   | 19.06                                     | 67        | 12.66      |
| doped LD29         | 60                                      | 1.07                   | 21.37                                     | 75        | 17.12      |
| doped LD29         | 60                                      | 1.10                   | 21.61                                     | 76        | 18.04      |
| doped LD29         | 60                                      | 1.09                   | 21.65                                     | 74        | 17.49      |
| doped LD29         | 60                                      | 1.07                   | 20.98                                     | 75        | 16.84      |
| doped LD29         | 40                                      | 1.07                   | 20.49                                     | 76        | 16.67      |
| doped LD29         | 40                                      | 1.03                   | 21.04                                     | 75        | 16.24      |
| doped LD29         | 40                                      | 1.02                   | 19.87                                     | 74        | 15.00      |
| doped LD29         | 40                                      | 1.03                   | 21.66                                     | 75        | 16.74      |
| doped LD29         | 20                                      | 1.04                   | 21.36                                     | 72        | 15.98      |
| doped LD29         | 20                                      | 1.05                   | 20.71                                     | 74        | 16.10      |
| doped LD29         | 20                                      | 1.04                   | 20.27                                     | 75        | 15.83      |
| doped LD29         | 20                                      | 1.06                   | 19.29                                     | 75        | 15.33      |
| doped spiro-OMeTAD | 73                                      | 1.08                   | 21.84                                     | 76        | 17.96      |
| doped spiro-OMeTAD | 73                                      | 1.07                   | 21.59                                     | 75        | 17.34      |
| doped spiro-OMeTAD | 73                                      | 1.11                   | 22.02                                     | 75        | 18.25      |
| doped spiro-OMeTAD | 73                                      | 1.08                   | 22.17                                     | 74        | 17.73      |

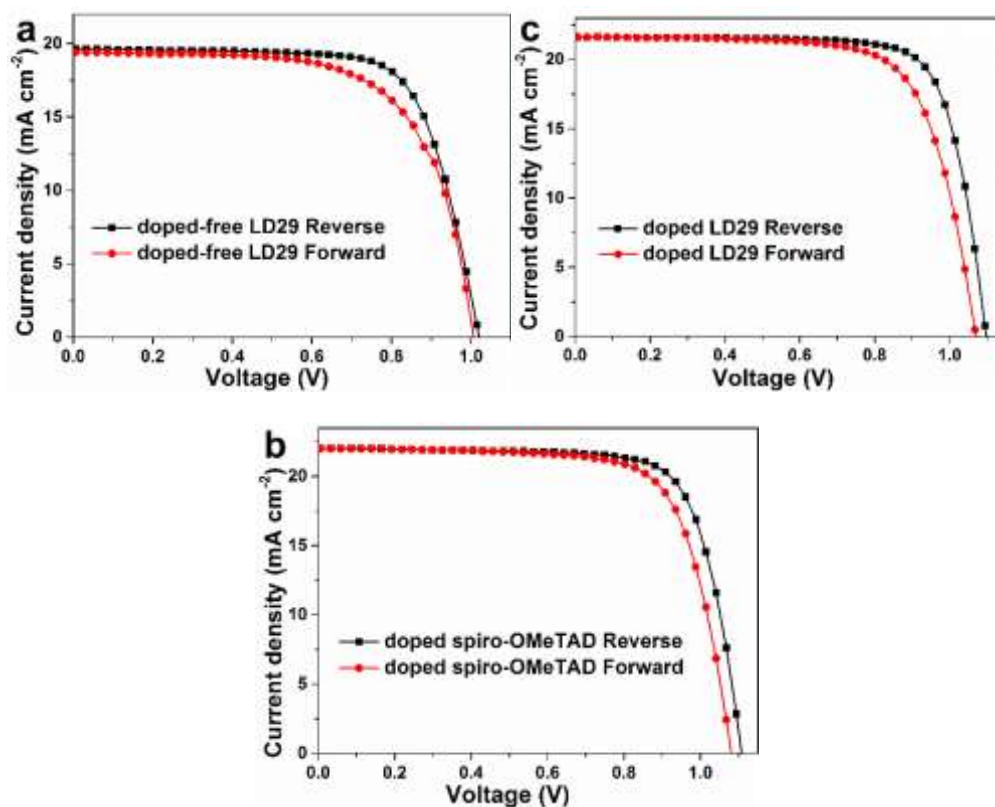

**Fig. S2** *J-V* curves measured by forward scan (from short circuit to open circuit) and reverse scan (from open circuit to short circuit) of the PSCs with different HTMs under AM 1.5 illumination.

**Table S2** Photovoltaic parameters of best-performing PSCs with different HTMs and measured through forward and reverse scans.

| HTM                  |         | $V_{oc}$ (V) | $J_{sc}$ ( $\text{mA cm}^{-2}$ ) | FF (%) | PCE (%) |
|----------------------|---------|--------------|----------------------------------|--------|---------|
| pristine <b>LD29</b> | Reverse | 1.02         | 19.60                            | 71     | 14.29   |
|                      | Forward | 1.00         | 19.42                            | 66     | 12.90   |
| doped <b>LD29</b>    | Reverse | 1.10         | 21.61                            | 76     | 18.04   |
|                      | Forward | 1.07         | 21.63                            | 71     | 16.45   |
| doped spiro-OMeTAD   | Reverse | 1.11         | 22.02                            | 75     | 18.25   |
|                      | Forward | 1.08         | 22.02                            | 72     | 17.11   |

**Table S3** Photovoltaic data for pristine LD29-based device with light soaking effect under one sun conditions.

| Time (min) | $V_{oc}$ (V) | $J_{sc}$ ( $\text{mA cm}^{-2}$ ) | FF (%) | PCE (%) |
|------------|--------------|----------------------------------|--------|---------|
| 0          | 1.00         | 19.45                            | 50     | 9.75    |
| 1          | 1.00         | 19.50                            | 62     | 12.14   |
| 2          | 1.01         | 19.56                            | 66     | 13.08   |
| 3          | 1.02         | 19.57                            | 69     | 13.76   |
| 4          | 1.02         | 19.59                            | 70     | 14.02   |
| 5          | 1.02         | 19.59                            | 70     | 14.25   |
| 6          | 1.02         | 19.60                            | 71     | 14.29   |

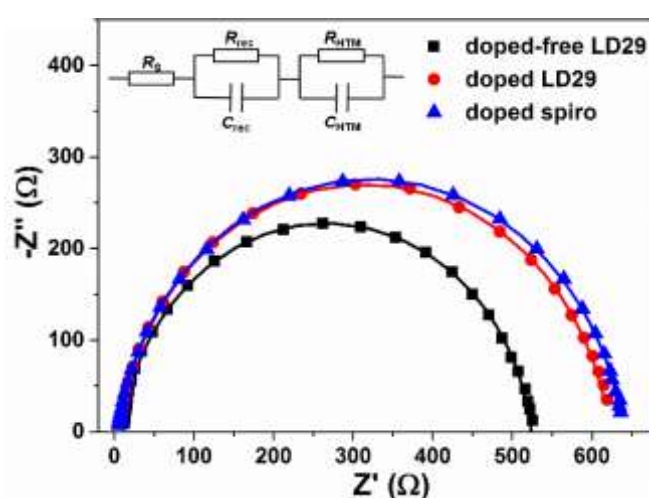

**Fig. S3** Nyquist plots of PSCs based on pristine LD29, doped LD29 and doped spiro-OMeTAD measured at 1.0 V forward bias in the dark.

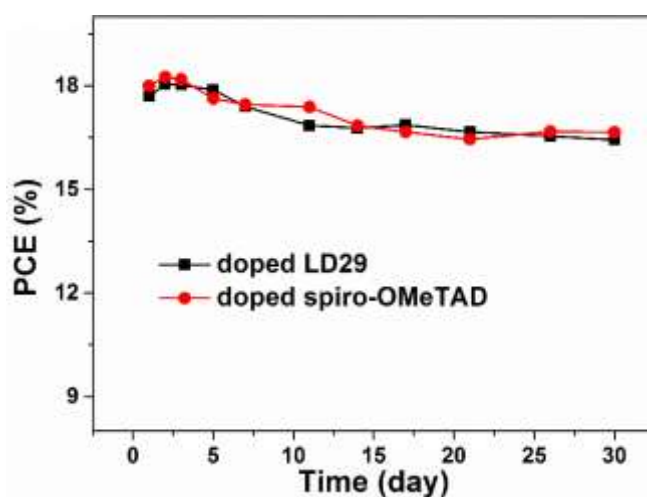

**Fig. S4** Stability test for the devices with different HTMs at room temperature without encapsulation in a dark drying oven.

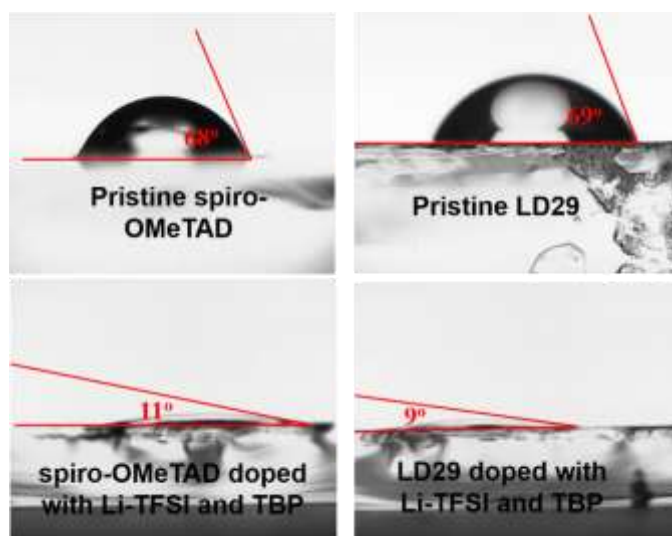

**Fig. S5** Water contact angle of pristine or doped **LD29** and spiro-OMeTAD.

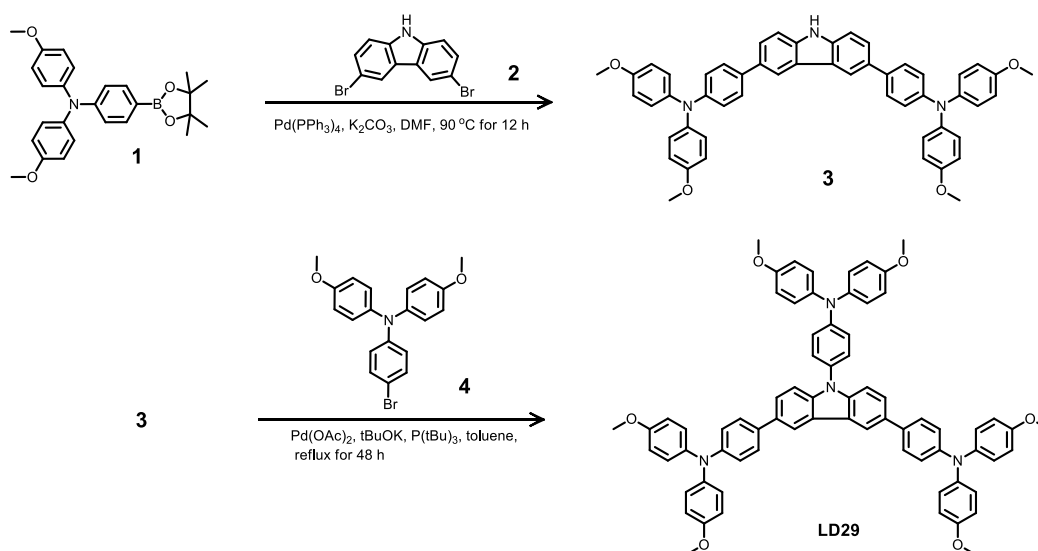

**Fig. S6** Synthetic routes for **LD29**.

Compound **1** and compound **4** are developed in our lab, the synthesis routine is shown in our previous report.<sup>1</sup> The structure of target product (**LD29**) is confirmed by NMR, elemental analysis and HRMS (MALDI-TOF) measurements.

### Compound **3**

Compound **2** (0.20 g, 0.6 mmol), compound **1** (0.56 g, 1.3 mmol), 2M solution of  $K_2CO_3$  (8 mmol, 1.1 g) in  $H_2O$ ,  $[Pd(PPh_3)_4]$  (0.05 mmol, 60 mg), DMF (20 mL) were added into a 50 mL Ar-protected flask. The reaction solution was kept with stirring at 90 °C for 12 h. After cooling to R.T., the reaction mixture was poured into cold  $Na_2SO_4$  aqueous solution, then the crude product precipitates out as solid. The crude product was purified by column chromatography ( $CH_2Cl_2/PE = 2:1$ ) to obtain compound **3** as light green solid (0.38 g, 81%).  $^1H$  NMR (400 MHz, DMSO)  $\delta$  11.28 (s, 1H), 8.44 (s, 2H), 7.60 (d,  $J = 8.1$  Hz, 6H), 7.50 (d,  $J = 6.8$  Hz, 2H), 7.05 (d,  $J = 5.6$  Hz, 2H), 6.92 (d,  $J = 6.6$  Hz, 2H), 3.75 (s, 12H). Anal. Calcd. for  $C_{52}H_{43}N_3O_4$ (%): C, 80.70; H, 5.60; N, 5.43. Found: C,

80.69; H, 5.61; N, 5.42.

### LD29

Compound **3** (0.23 g, 0.3 mmol), compound **4** (0.15 g, 0.4 mmol), tBuONa (0.58 g, 6 mmol), P(tBu)<sub>3</sub> (0.1 M in toluene, 0.3 mL), Pd(OAc)<sub>2</sub> (45 mg, 0.2 mmol) were added into a 50 mL flask. Then 15 mL dry toluene was injected in to the flask and degassed using Ar. The reaction solution was kept with stirring at reflux for 48 h. After cooling to R.T., the mixture was diluted by 30 mL CH<sub>2</sub>Cl<sub>2</sub> and washed with 50 mL deionized water for 3 times. The organic phase was dried by Na<sub>2</sub>SO<sub>4</sub>, and removed solvent using rotary evaporator. The crude product was purified by column chromatography (CH<sub>2</sub>Cl<sub>2</sub>/PE = 2:1) to obtain white **LD29** (0.26 g, 82%). <sup>1</sup>H NMR (400 MHz, DMSO) δ 8.56 (d, 2H), 7.67 (m, 6H), 7.40 (d, *J* = 6.2 Hz, 4H), 7.06-6.93 (m, 28H), 3.76 (s, 18H). Anal. Calcd. for C<sub>72</sub>H<sub>60</sub>N<sub>4</sub>O<sub>6</sub>(%) C, 80.27; H, 5.61; N, 5.20. Found: C, 80.25; H, 5.59; N, 5.21. MS (MALDI-TOF) *m/z*: [M<sup>+</sup>] calcd, 1076.45; found 1076.44.

### A simple analysis of relative costs of spiro-OMeTAD and LD29

The lab synthesis cost of **LD29** are estimated on a model originally proposed by Osedach *et al.*<sup>2</sup> Recently, Pertrus and Malinauskas *et al.*<sup>3-5</sup> has used the model to estimate the cost of hole transporting materials. For every synthetic step the required amounts of reactants, catalysts, reagents and solvents are calculated to obtain 1 gram of **LD29** are reported (Table S6).

**Table S4** Materials, quantities and cost for the synthesis of **compound 3**.

| Chemical                                                                                                      | Weight<br>Reagent or<br>solvent<br>(g/g) | Price of<br>chemical<br>(RMB/g) | Cost of<br>chemical<br>(RMB/g product) | Total cost<br>(RMB/g) |
|---------------------------------------------------------------------------------------------------------------|------------------------------------------|---------------------------------|----------------------------------------|-----------------------|
| 4-methoxy-N-(4-methoxyphenyl)-N-(4-(4,4,5,5-tetramethyl-1,3,2-dioxaborolan-2-yl)phenyl)aniline <sup>[1]</sup> | 1.47                                     | 70                              | 103                                    |                       |
| 3,6-Dibromocarbazole                                                                                          | 0.53                                     | 2.73 (ark)                      | 1.44                                   |                       |
| DMF                                                                                                           | 50                                       | 0.03                            | 1.5                                    |                       |
| Pd(PPh <sub>3</sub> ) <sub>4</sub>                                                                            | 0.16                                     | 72                              | 11.52                                  |                       |
| K <sub>2</sub> CO <sub>3</sub>                                                                                | 2.89                                     | 0.04                            | 0.032                                  |                       |
| Na <sub>2</sub> SO <sub>4</sub>                                                                               | 5                                        | 0.02                            | 0.1                                    |                       |
| CH <sub>2</sub> Cl <sub>2</sub>                                                                               | 450                                      | 0.03                            | 13.5                                   |                       |
| Petroleum ether                                                                                               | 260                                      | 0.02                            | 5.2                                    |                       |
| <b>compound 3</b>                                                                                             |                                          |                                 |                                        | <b>136</b>            |

**Table S5** Materials, quantities and cost for the synthesis of **LD29**.

| Chemical                          | Weight<br>Reagent or<br>solvent<br>(g/g) | Price of<br>chemical<br>(RMB/g) | Cost of<br>chemical<br>(RMB/g product) | Total cost<br>(RMB/g) |
|-----------------------------------|------------------------------------------|---------------------------------|----------------------------------------|-----------------------|
| <b>Compound 3</b>                 | 0.89                                     | 136                             | 121                                    |                       |
| <b>Compounds 4</b> <sup>[1]</sup> | 0.58                                     | 50                              | 29                                     |                       |
| tBuONa                            | 2.23                                     | 0.64                            | 1.42                                   |                       |
| P(tBu) <sub>3</sub>               | 0.1                                      | 55                              | 5.5                                    |                       |
| Pd(OAc) <sub>2</sub>              | 0.17                                     | 172                             | 29                                     |                       |
| toluene                           | 50                                       | 0.04                            | 2                                      |                       |
| CH <sub>2</sub> Cl <sub>2</sub>   | 450                                      | 0.03                            | 13.5                                   |                       |
| Petroleum ether                   | 260                                      | 0.02                            | 5.2                                    |                       |
| <b>LD29</b>                       |                                          |                                 |                                        | <b>207</b>            |

207 RMB/g  $\approx$  30.3 \$/g

**Table S6** Survey of the estimated chemical synthesis cost for different HTMs.

| compound     | Material cost (\$/g) | Commercial price (\$/g) |
|--------------|----------------------|-------------------------|
| <b>LD29</b>  | 30.2                 | -                       |
| Spiro-OMeTAD | 91.67 <sup>3-5</sup> | 170-500 <sup>3-5</sup>  |

**Table S7** The comparison of some reported doped HTMs and **LD29** with cost analysis.

| sample          | Molecular<br>structures                                                             | Device structures                                                                                           | PCE<br>(%) <sup>[a]</sup> | Ref.<br>PCE <sup>[b]</sup> | cost<br>(\$/g) <sup>[c]</sup> | Ref.         |
|-----------------|-------------------------------------------------------------------------------------|-------------------------------------------------------------------------------------------------------------|---------------------------|----------------------------|-------------------------------|--------------|
| LD29            | 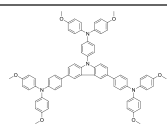 | FTO/TiO <sub>2</sub> /<br>(FAPbI <sub>3</sub> ) <sub>0.85</sub> (MAPbBr <sub>3</sub> ) <sub>0.15</sub> /HTM | 18.09                     | 18.25                      | 30.2                          | This work    |
| TET             |  | FTO/SnO <sub>2</sub> /C <sub>60</sub> -<br>SAM/MA <sub>0.7</sub> FA <sub>0.3</sub> PbI <sub>3</sub> /HTM    | 18.6                      | 19.0                       | 123                           | <sup>6</sup> |
| TPA-<br>ANT-TPA |  | FTO/TiO <sub>2</sub> /MAPbI <sub>3</sub> /HTM                                                               | 17.5                      | 16.8                       | 67                            | <sup>7</sup> |
| NDT             |  | FTO/SnO <sub>2</sub> /MAPbI <sub>3</sub> /HTM                                                               | 18.78                     | 18.05                      | 78.8                          | <sup>8</sup> |

|              |                                                                                     |                                                                                                          |       |       |              |    |
|--------------|-------------------------------------------------------------------------------------|----------------------------------------------------------------------------------------------------------|-------|-------|--------------|----|
| TRUX-E-T     | 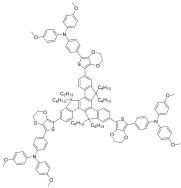   | FTO/SnO <sub>2</sub> /C <sub>60</sub> -SAM/MA <sub>0.7</sub> FA <sub>0.3</sub> PbI <sub>3</sub> /HTM     | 18.36 | 19.13 | 38.9         | 9  |
| Diazo-OMeTPA |    | FTO/TiO <sub>2</sub> /MAPbI <sub>3</sub> /HTM/Au                                                         | 14.4  | 15.1  | 54           | 10 |
| Yih-1        |    | FTO/TiO <sub>2</sub> /MAPbI <sub>3</sub> /HTM                                                            | 16.06 | 16.08 | 29.14        | 11 |
| YN2          |    | FTO/TiO <sub>2</sub> / (FAPbI <sub>3</sub> ) <sub>0.85</sub> (MAPbBr <sub>3</sub> ) <sub>0.15</sub> /HTM | 19.27 | 17.80 | 35.5         | 12 |
| TPA-TPM      |    | FTO/TiO <sub>2</sub> / (FAPbI <sub>3</sub> ) <sub>0.85</sub> (MAPbBr <sub>3</sub> ) <sub>0.15</sub> /HTM | 16.76 | 17.42 | 52.3         | 13 |
| Si-OMeTPA    |   | p-i-n ITO/HTM/MAPbI <sub>3</sub> /PCBM                                                                   | 19.06 | -     | 29.57        | 14 |
| OMe-TATPyr   |  | ITO/SnO <sub>2</sub> /MAPbI <sub>3</sub> /HTM                                                            | 20.0  | 17.3  | 50.5         | 15 |
| H16          |  | FTO/TiO <sub>2</sub> / mixed-ion perovskite/HTM                                                          | 18.16 | 18.27 | 30           | 16 |
| CDTh-EtHex 2 |  | FTO/TiO <sub>2</sub> /MAPbI <sub>3</sub> /HTM                                                            | 15.51 | 16.19 | 179.05 (€/g) | 17 |
| A102         |  | FTO/TiO <sub>2</sub> / (FAPbI <sub>3</sub> ) <sub>0.85</sub> (MAPbBr <sub>3</sub> ) <sub>0.15</sub> /HTM | 17.56 | 12.27 | 34.6         | 18 |

[a] The best PCE of developed HTMs; [b] The best PCE of standard doped Spiro-OMeTAD; [c] Synthesis cost of developed HTMs in their reports.



**Table S8** The comparison of some reported doped-free HTMs and **LD29**.

| sample      | Molecular structures                                                                | Device structure                                                                                            | PCE (%) <sup>[a]</sup> | Ref.      |
|-------------|-------------------------------------------------------------------------------------|-------------------------------------------------------------------------------------------------------------|------------------------|-----------|
| LD29        | 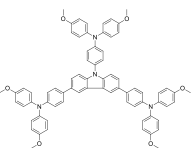   | FTO/TiO <sub>2</sub> /<br>(FAPbI <sub>3</sub> ) <sub>0.85</sub> (MAPbBr <sub>3</sub> ) <sub>0.15</sub> /HTM | 14.2<br>9              | This work |
| Spiro-CPDT  |    | FTO/TiO <sub>2</sub> /MAPbI <sub>3</sub> /HTM                                                               | 13.4                   | 19        |
| TAE-1       |    | FTO/TiO <sub>2</sub> /MAPbI <sub>3</sub> /HTM                                                               | 11.0<br>2              | 20        |
| SAF-OMe     |   | ITO/TiO <sub>2</sub> /MAPbI <sub>3-x</sub> Cl <sub>x</sub> /HTM                                             | 12.3<br>9              | 21        |
| Z1011       |  | FTO/TiO <sub>2</sub> /MAPbI <sub>3</sub> /HTM                                                               | 16.3                   | 22        |
| Trux 1      |  | ITO/HTM/MAPbI <sub>3</sub> /PCBM/ZnO/<br>Al                                                                 | 10.2                   | 23        |
| 1           |  | FTO/TiO <sub>2</sub> /MAPbI <sub>3</sub> /HTM                                                               | 3.18                   | 24        |
| Trux-OMeTAD |  | ITO/HTM/MAPbI <sub>3</sub> /PCBM/ZnO/<br>Al                                                                 | 18.6                   | 25        |
| BDT-C1      |  | FTO/TiO <sub>2</sub> /MAPbI <sub>3</sub> /HTM                                                               | 13.9                   | 26        |

|                      |                                                                                     |                                                                                      |           |    |
|----------------------|-------------------------------------------------------------------------------------|--------------------------------------------------------------------------------------|-----------|----|
| Z1013                | 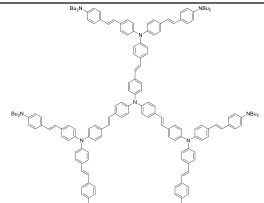   | FTO/TiO <sub>2</sub> /MAPbI <sub>3</sub> /HTM                                        | 15.4      | 27 |
| 2TPA-2-DP            |    | FTO/TiO <sub>2</sub> /MAPbI <sub>3</sub> /HTM                                        | 12.9<br>6 | 28 |
| DERDTS-TBDT          |    | ITO/TiO <sub>2</sub> /MAPbI <sub>3</sub> -<br>xCl <sub>x</sub> /HTM/MoO <sub>3</sub> | 16.2      | 29 |
| TPBC                 |    | FTO/TiO <sub>2</sub> /MAPbI <sub>3</sub> /HTM                                        | 13.1      | 30 |
| DOR3T-TBDT           |    | ITO/TiO <sub>2</sub> /MAPbI <sub>3</sub> -<br>xCl <sub>x</sub> /HTM/MoO <sub>3</sub> | 14.9      | 31 |
| POZ2                 |   | FTO/TiO <sub>2</sub> /MAPbI <sub>3</sub> /HTM                                        | 12.8      | 32 |
| oligothiophen<br>e 1 |  | FTO/TiO <sub>2</sub> /MAPbI <sub>3</sub> /HTM                                        | 10.5      | 33 |
| M1                   |  | ITO/ZnO/PC <sub>70</sub> BM/<br>MAPbI <sub>3</sub> /HTM                              | 13.2      | 34 |
| apv-EC               |  | FTO/TiO <sub>2</sub> /MAPbI <sub>3</sub> /HTM                                        | 12.0      | 35 |
| TPBC                 |  | FTO/TiO <sub>2</sub> /MAPbI <sub>3</sub> /HTM                                        | 13.3      | 36 |
| H101                 |  | FTO/TiO <sub>2</sub> /MAPbI <sub>3</sub> /HTM                                        | 11.0<br>3 | 37 |

## References

1. X. Liu, F. Kong, R. Ghadari, S. Jin, W. Chen, T. Yu, T. Hayat, A. Alsaedi, F. Guo and Z. A. Tan, *Energy Tech.*, 2017, **5**, 1788-1794.
2. T. P. Osedach, T. L. Andrew and V. Bulović, *Energy Environ. Sci.*, 2013, **6**, 711-718.
3. M. L. Petrus, T. Bein, T. J. Dingemans and P. Docampo, *J. Mater. Chem. A*, 2015, **3**, 16874-16874.
4. T. Malinauskas, M. Saliba, T. Matsui, M. Daskeviciene, S. Urnikaite, P. Gratia, R. Send, H. Wonneberger, I. Bruder and M. Grätzel, *Energy Environ. Sci.*, 2016, **9**, 1681-1686.
5. M. Saliba, S. Orlandi, T. Matsui, S. Aghazada, M. Cavazzini, J. P. Correabaena, P. Gao, R. Scopelliti, E. Mosconi and K. H. Dahmen, *Nat. Energy*, 2016, **1**, 15017.
6. Y. Sun, C. Wang, D. Zhao, J. Yu, X. Yin, C. R. Grice, R. A. Awni, N. Shrestha, Y. Yu and L. Guan, *Solar RRL*, 2017, 1700175.
7. H. D. Pham, T. T. Do, J. Kim, C. Charbonneau, S. Manzhos, K. Feron, W. C. Tsoi, J. R. Durrant, S. M. Jain and P. Sonar, *Adv. Energy Mater.*, 2018, DOI: 10.1002/aenm.201703007, 1703007.
8. B. B. Cui, N. Yang, C. Shi, S. Yang, J. Y. Shao, Y. Han, L. Zhang, Q. Zhang, Y. W. Zhong and Q. Chen, *J. Mater. Chem. A*, 2018, **6**, 10057-10063.
9. L. Guan, X. Yin, D. Zhao, C. Wang, Q. An, J. Yu, N. Shrestha, C. Grice, R. Awni and Y. Yu, *J. Mater. Chem. A*, 2017, **5**, 23319-23327.
10. Michiel L. Petrus, A. Music, A. C. Closs, J. C. Bijleveld, M. T. Sirtl, Y. Hu, T. J. Dingemans, T. Bein and P. Docampo, *J. Mater. Chem. A*, 2017, **5**, 25200-25210.
11. Y. C. Chen, S. K. Huang, S. S. Li, Y. Y. Tsai, C. P. Chen and Y. J. Chang, *ChemSusChem*, 2018, <https://doi.org/10.1002/cssc.201801258>.
12. P. Xu, P. Liu, Y. Li, B. Xu, L. Kloo, L. Sun and Y. Hua, *ACS Appl. Mater. Interfaces*, 2018, **10**, 19697-19703.
13. X. Liu, F. Kong, T. Cheng, W. Chen, Z. A. Tan, T. Yu, F. Guo, J. Chen, J. Yao and S. Dai, *ChemSusChem*, 2016, **10**, 968-975.
14. R. Xue, M. Zhang, G. Xu, J. Zhang, W. Chen, H. Chen, M. Yang, C. Cui, Y. Li and Y. Li, *J. Mater. Chem. A*, 2017, **6**, 404-413.
15. Q. Q. Ge, J. Y. Shao, J. Ding, L. Y. Deng, W. K. Zhou, Y. X. Chen, J. Y. Ma, L. J. Wan, J. Yao and J. S. Hu, *Angew. Chem. Inter. Ed.*, 2018, **57**, 10959-10965.
16. S. Mabrouk, M. Zhang, Z. Wang, M. Liang, B. Bahrami, Y. Wu, J. Wu, Q. Qiao and S. Yang, *J. Mater. Chem. A*, 2018, **6**, 7950-7958.
17. L. Calio, S. Kazim, M. Salado, I. Zimmermann, M. K. Nazeeruddin and S. Ahmad, *Sustainable Energy & Fuels*, 2018, DOI: 10.1039/C1038SE00119G.
18. X. Liu, F. Kong, R. Ghadari, S. Jin, T. Yu, W. Chen, G. Liu, Z. Tan, J. Chen and S. Dai, *Chem. Commun.*, 2017, **53**, 9558-9561.
19. M. Franckevičius, A. Mishra, F. Kreuzer, J. Luo, S. M. Zakeeruddin and M. Grätzel, *Mater. Horiz.*, 2015, **2**, 613-618.
20. L. Cabau, I. Garcia-Benito, A. Molina-Ontoria, N. F. Montcada, N. Martin, A. Vidal-Ferran and E. Palomares, *Chem. Commun.*, 2015, **51**, 13980-13982.
21. Y. K. Wang, Z. C. Yuan, G. Z. Shi, Y. X. Li, Q. Li, F. Hui, B. Q. Sun, Z. Q. Jiang and L. S. Liao, *Adv. Funct. Mater.*, 2016, **26**, 1375-1381.
22. F. Zhang, C. Yi, P. Wei, X. Bi, J. Luo, G. Jacopin, S. Wang, X. Li, Y. Xiao and S. M. Zakeeruddin, *Adv. Energy Mater.*, 2016, **6**, 1600461.

23. R. Grisorio, R. Iacobellis, A. Listorti, M. L. De, M. P. Cipolla, M. Manca, A. Rizzo, A. Abate, G. Gigli and G. P. Suranna, *ACS Appl. Mater. Inter.*, 2017, **9**, 24778-24787.
24. J. Wang, Y. Chen, M. Liang, G. Ge, R. Zhou, Z. Sun and S. Xue, *Dyes Pigments*, 2016, **125**, 399-406.
25. C. Huang, W. Fu, C. Z. Li, Z. Zhang, W. Qiu, M. Shi, P. Heremans, A. K. Jen and H. Chen, *J. Am. Chem. Soc.*, 2016, **138**, 2528-2531.
26. C. Chen, M. Cheng, P. Liu, J. Gao, L. Kloo and L. Sun, *Nano Energy*, 2016, **23**, 40-49.
27. F. Zhang, X. Zhao, C. Yi, D. Bi, X. Bi, P. Wei, X. Liu, S. Wang, X. Li and S. M. Zakeeruddin, *Dyes Pigments*, 2017, **136**, 273-277.
28. L. Zhu, J. Xiao, J. Shi, J. Wang, S. Lv, Y. Xu, Y. Luo, Y. Xiao, S. Wang and Q. Meng, *Nano Res.*, 2015, **8**, 1116-1127.
29. Y. Liu, Z. Hong, Q. Chen, H. Chen, W. H. Chang, Y. M. Yang, T. B. Song and Y. Yang, *Adv. Mater.*, 2015, **28**, 440-446.
30. Y. Song, S. Lv, X. Liu, X. Li, S. Wang, H. Wei, D. Li, Y. Xiao and Q. Meng, *Chem. Commun.*, 2014, **50**, 15239-15242.
31. Y. Liu, Q. Chen, H. S. Duan, H. Zhou, Y. Yang, H. Chen, S. Luo, T. B. Song, L. Dou and Z. Hong, *J. Mater. Chem. A*, 2015, **3**, 11940-11947.
32. M. Cheng, B. Xu, C. Chen, X. Yang, F. Zhang, Q. Tan, Y. Hua, L. Kloo and L. Sun, *Adv. Energy Mater.*, 2015, **5**, 1401720.
33. P. Qin, H. Kast, M. K. Nazeeruddin, S. M. Zakeeruddin, A. Mishra, P. Bäuerle and M. Grätzel, *Energy Environ. Sci.*, 2014, **7**, 2981-2985.
34. M. Cheng, C. Chen, X. Yang, J. Huang, F. Zhang, B. Xu and L. Sun, *Chem. Mater.*, 2015, **27**, 1808-1814.
35. S. Lv, Y. Song, J. Xiao, L. Zhu, J. Shi, H. Wei, Y. Xu, J. Dong, X. Xu and S. Wang, *Electrochim. Acta*, 2015, **182**, 733-741.
36. S. Lv, L. Han, J. Xiao, L. Zhu, J. Shi, H. Wei, Y. Xu, J. Dong, X. Xu and D. Li, *Chem. Commun.*, 2014, **50**, 6931-6934.
37. H. Li, K. Fu, A. Hagfeldt, M. Grätzel, S. G. Mhaisalkar and A. C. Grimsdale, *Angew. Chem. Int. Edit.*, 2014, **53**, 4085-4088.
